# Supplementary material
Source: PubMed Central journal article supplement (PMC4515119)
Supplement: embr0016-0791-sd6.pdf [file embr0016-0791-sd6.pdf]

**Table EV5.** Agilent 6490 triple quadrupole instrument settings used in this study

| Source parameters      |          |
|------------------------|----------|
| Ion Mode               | positive |
| Gas temperature        | 110 °C   |
| Gas flow               | 19 L/min |
| Nebuliser              | 25 psi   |
| Sheath gas temperature | 375 °C   |
| Sheath gas flow        | 11 L/min |
| Capillary voltage      | 3000 V   |
| Nozzle voltage         | 0 V      |
| iFunnel parameters     |          |
| High pressure RF       | 70 V     |
| Low pressure RF        | 80 V     |

To avoid the fragmentation of nucleosides at the source the *Fragmentor* voltage was decreased to 300 V
