# Supplementary material
Source: PubMed Central journal article supplement (PMC4515119)
Supplement: embr0016-0791-sd7.pdf [file embr0016-0791-sd7.pdf]

**Table EV6:** MRM transitions used in this study.

| Nucleoside                          | Precursor ion (m/z) | Fragment ion (m/z) | Collision energy | Cell accelerator voltage |
|-------------------------------------|---------------------|--------------------|------------------|--------------------------|
| dC* (natural isotopologue +1)**     | 229                 | 113                | 5                | 8                        |
| 5mdC                                | 241.9               | 126                | 6                | 8                        |
| 5hmdC                               | 257.9               | 142                | 8                | 7                        |
| 5fdC                                | 256.1               | 140                | 6                | 8                        |
| 5cadC                               | 272                 | 156                | 6                | 8                        |
| <sup>15</sup> N <sub>3</sub> -dC    | 231                 | 115                | 5                | 8                        |
| <sup>2</sup> H <sub>3</sub> -5mdC   | 244.9               | 129                | 6                | 8                        |
| <sup>15</sup> N <sub>3</sub> -5hmdC | 260.9               | 145                | 8                | 7                        |
| <sup>15</sup> N <sub>3</sub> -5fdC  | 259.1               | 143                | 6                | 8                        |
| <sup>15</sup> N <sub>3</sub> -5cadC | 275                 | 159                | 6                | 8                        |

\*MS1 and MS2 resolutions were set to unit for all ions except dC and dG where MS1 resolution was set to enhanced.

\*\*detection of natural isotopomers increases the dynamic range of the method as was described previously (Tsuji et al. 2014).
